# Supplementary material
Source: publisher site journal article supplement (http://kjim.org/upload/media/kjim-2022-396-Supplementary-Fig-2.pdf)
Supplement: Supplementary file 1 [file kjim-2022-396-Supplementary-Fig-2.pdf]

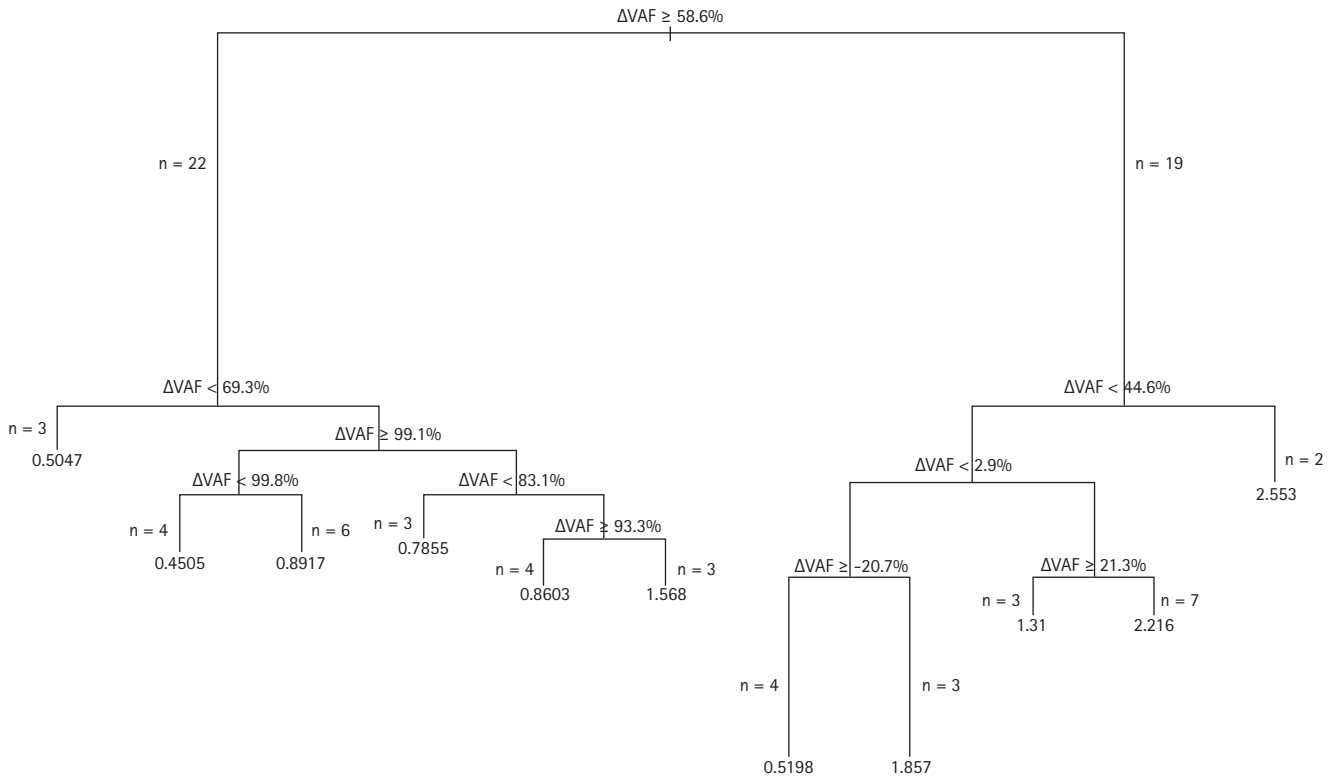

**Supplementary Figure 2.** Recursive partitioning for defining significant clearance rate ( $\Delta$ ) of variant allele frequency (VAF).
